# Supplementary material
Source: PubMed Central journal article supplement (PMC5591745)
Supplement: NIHMS891970-supplement-1__2.pdf [file NIHMS891970-supplement-1__2.pdf]

1  
2  
3  
4  
5  
6  
7  
8  
9 669  
10  
11 670  
12  
13  
14  
15  
16  
17  
18  
19  
20  
21  
22  
23  
24  
25 671  
26 672  
27 673  
28  
29 674  
30 675  
31  
32 676  
33 677  
34  
35 678  
36 679  
37  
38 680  
39 681  
40  
41 682  
42 683  
43  
44 684  
45  
46  
47  
48  
49  
50  
51  
52  
53  
54  
55  
56  
57  
58  
59  
60  
61  
62  
63  
64  
65

**Supplemental Table 1: Cumulative IV antibiotic doses by dosing frequency (>0 doses)**

|                     | q6            | q8           | q12          | q24       | q36  | q48      |
|---------------------|---------------|--------------|--------------|-----------|------|----------|
| <b>Tobramycin</b>   |               |              |              |           |      |          |
| <i>Median Doses</i> | 47            | 48           | 6.5          | 31        | 3    | 4        |
| <i>Range</i>        | (5 – 190)     | (1 – 321)    | (2 – 50)     | (2 – 262) |      | (1 – 16) |
| <i>Median Days</i>  | 11.75         | 16           | 3.25         | 31        | 4.5  | 8        |
| <i>Range</i>        | (1.25 – 47.5) | (0.33 – 107) | (1 – 25)     | (2 – 262) |      | (2 – 32) |
| <b>Amikacin</b>     |               |              |              |           |      |          |
| <i>Median Doses</i> | None          | 2            | None         | 35        | None | None     |
| <i>Median Days</i>  | None          | 0.67         | None         | 35        | None | None     |
| <b>Vancomycin</b>   |               |              |              |           |      |          |
| <i>Median Doses</i> | 39            | 72           | 7            | 36        | None | None     |
| <i>Range</i>        | (23 – 118)    | (6 – 417)    | (3 – 33)     | (1 – 191) |      |          |
| <i>Median Days</i>  | 9.75          | 24           | 3.5          | 36        | None | None     |
| <i>Range</i>        | (5.75 – 29.5) | (2 – 139)    | (1.5 – 16.5) | (1 – 191) |      |          |

**Supplemental Table 1:** Median cumulative life-time doses for tobramycin q6 was 47 over the course of 11.75 days, q8 was 48 over 16 days, q12 was 6.5 over 3.25 days, q24 was 31 over 31 days, q36 was 3 over 4.5 days and, q48 was 4 over 8 days. Median cumulative lifetime doses for vancomycin q6 was 39 over 9.75 days, q8 was 72 over 24 days, q12 was 7 over 3.5 days and, q24 was 36 over 36 days. Amikacin was the least common antibiotic in the dataset and median life-time cumulative doses for q8 was 2 over 0.7 days and, q24 was 35 over 35 days.

1  
2  
3  
4  
5  
6  
7  
8  
9  
10  
11  
12  
13  
14  
15  
16  
17  
18  
19  
20  
21  
22  
23  
24  
25  
26  
27  
28  
29  
30  
31  
32  
33  
34  
35  
36  
37  
38  
39  
40  
41  
42  
43  
44  
45  
46  
47  
48  
49  
50  
51  
52  
53  
54  
55  
56  
57  
58  
59  
60  
61  
62  
63  
64  
65

**Supplemental Table 2:** Cumulative *weighted* dosing and association with hearing loss (adjusting for age at hearing test and gender)

| <b>IV Antibiotic doses (N=81)</b>                                                   | <b>Odds Ratio (95% CI)</b> | <b>p-value</b> |
|-------------------------------------------------------------------------------------|----------------------------|----------------|
| Q1 (0.5 – 5.25)                                                                     | 1.00                       | 0.05*          |
| Q2 (6.5 – 24.5)                                                                     | 1.10 (0.25, 4.85)          |                |
| Q3 (25.5 - 92)                                                                      | 2.34 (0.54, 10.10)         |                |
| Q4 (92.25 – 399.5)                                                                  | 3.71 (0.86, 15.97)         |                |
| Low Dosing (Q1 & Q2)                                                                | 1.00                       | 0.06           |
| High Dosing (Q3 & Q4)                                                               | 2.83 (0.98, 8.16)          |                |
| <b>IV Antibiotic doses (excluding subjects who only received Vancomycin) (N=78)</b> |                            |                |
| Q1 (0.5 – 3.75)                                                                     | 1.00                       | 0.05*          |
| Q2 (4 – 12.75)                                                                      | 0.51 (0.11, 2.33)          |                |
| Q3 (13 – 33.75)                                                                     | 2.43 (0.59, 10.05)         |                |
| Q4 (34.75 – 149.5)                                                                  | 2.80 (0.64, 12.37)         |                |
| Low Dosing (Q1 & Q2)                                                                | 1.00                       | 0.02           |
| High Dosing (Q3 & Q4)                                                               | 3.60 (1.25, 10.34)         |                |

**Supplemental Table 2:** Odds ratios were calculated to estimate the probability of SNHL with low (Q1) to high (Q4) dosing groups. When Q1 was used as the referent groups, there was a significantly higher odds ratio that participants with the highest (Q4) IV antibiotic exposure would develop SNHL. This effect was observed with and without the inclusion of participants who only received vancomycin (bottom table). These effects remained statistically significant when the two lowest exposure groups (Q1 & Q2) were compared to the two highest exposure groups (Q3 & Q4).
